# Supplementary material
Source: publisher figshare collection journal article supplement (https://tandf.figshare.com/ndownloader/files/36346786)
Supplement: Supplementary file 1 [file 36346786]

**Supplementary Material 1 - Survey Questions**

**Respondent Characteristics**

***Section 1: Physiotherapist lecturer background Characteristics***

1. Please state your age category: (18-25; 26-30; 31-35; 36-45; 46-55; 56-65; 65+)

2. How do you identify?

### 3. At what level of teaching do you currently deliver?

### 4. Do you teach clinical or non-clinical skills online? (Clinical, Non-clinical, Both)

### 5. Under the current COVID restrictions how are you delivering your teaching on your programme? (Remains Face to Face; Fully Online; Hybrid (Face to Face and Online) - approx 25% face-to-face; Hybrid (Face to Face and Online) - approx 50% face-to-face; Hybrid (Face to Face and Online) - approx 75% face-to-face)

### 6. Do you have any previous experience of teaching online? (Yes, extensive; Yes, limited; No)

***Section 2: Online Learning Perceptions***

### 7. What do you consider the are advantages of online teaching (Select all those that apply):

### (Student's development of technology and digital skills for future use; Student's may be more confident to interact/answer questions (secondary to anonymity); Student’s find video’s/demonstrations useful to supplement learning; Student's able to learn better at their own pace (secondary to recorded sessions); The convenience of learning in home environment for the student; Fast and easy sharing of resources’ Fostering collaborative and exploratory learning environments beyond scheduled teaching; Monitoring of student engagement/additional analytics easier; Fosters independence, time management skills and allows students to manage their learning; I do not believe there are any advantages; Other – please specify).

### 8. What do you consider are the disadvantages of online learning (Select all those that apply): (Lack of cohort identity; Students unable to develop close relationships with peers; Lack of peer feedback during sessions for students; Lack of one to one feedback from tutors; Unable to practice ‘hands on’ skills; Decrease chances of employability – if student's lack exposure to clinical skills; Students can lack confidence in using the technology; Connectivity issues during sessions; Pace of delivery can be affected; Doesn’t meet preferred learning style of the students; Difficult to track individual student progress; Requires competence in using online platforms beyond delivering subject level knowledge only; More time-intensive for academics due to increased preparation time; I do not believe there are any disadvantages; Other – please specify).

9. Do you feel students are disadvantaged with online compared to face-to-face learning? (Yes – Across all online modules; Yes – Only if clinical module; No)

Please explain your answer.

### 10. How have you found the transition to online learning from face-to-face? (Difficult to manage time effectively; Use of new digital tools has been challenging; Requires a lot of extra work to plan sessions, make recordings etc.; It has provided beneficial opportunities to use technology to enhance teaching; There has been plenty of support available to help with the transition; Other – please specify)

### 11. Do you believe that online learning provides a comparable experience with face-to-face teaching? (Yes; No).

### Please explain your answer.

### 12. Do you think online learning has had a negative or positive impact on students’ understanding of the subject area? (Positive; Negative)

### 12a) If POSITIVE please select all those that apply: (Recorded sessions allow students to review content; Technology/Apps aid the learning process; Increases attendance; Interactive teaching techniques (e.g. polls, quizzes) allows all students to participate; Online environment ‘safe’ for students to participate compared to face-to-face classes in front of peers; Other – please specify).

### 12b) If NEGATIVE please select all those that apply: (Connectivity Issues; Opportunity for students to ‘hide’ in sessions; Decrease practice time for clinical skills; Inability to practice clinical skills on range of individuals; Difficult for students to contribute as much compared to a face-to-face session Other – please specify).

13. You are equally motivated to teach online compared to face to face? (Likert scale – 5 – Strong Agree, 4- Agree, 3 - Impartial, 2- Disagree, 1 – Strongly Disagree).

### Please explain your answer.

14. Students are satisfied with an online learning approach within their degree programme? (Likert scale – 5 – Strong Agree, 4- Agree, 3 - Impartial, 2- Disagree, 1 – Strongly Disagree).

### Please explain your answer.

### 15. What further support do you feel is required to make online learning most effective for students? (Further advice on how to use the technology for academics; Training on how to deliver on a virtual platform for academics; Training in technology for students (outside of taught sessions); Further explanation of the value of it to students; Other – please specify).

### 16. Have you encountered any difficulties with online teaching? (Yes; No)

### Please explain your answer.

### 17. Do you think online teaching will affect graduate’s ability to perform the proficiencies of physiotherapy upon graduation? (Yes; No)

### Please explain your answer.

### 18. Following the resolution of COVID-19, assuming teaching can resume to pre-virus norms, would you consider utilising on-line learning? (Yes – but only non-clinical modules; Yes - but only clinical modules; Yes – any approved modules; No – we will revert to a face-to-face delivery for all modules).
